# Supplementary material
Source: Springer Nature journal article supplement (https://www.springermedizin.de/resource/supplementary/12891_2010_1165_MOESM4_ESM.pdf/9507214)

|                                      |            |
|--------------------------------------|------------|
| Medline (Limited to English, Humans) | 87         |
| AMED (Limited to Humans)             | 65         |
| CCRCT                                | 69         |
| CINAHL (Limited to English, Humans)  | 27         |
| <b>TOTAL</b>                         | <b>248</b> |

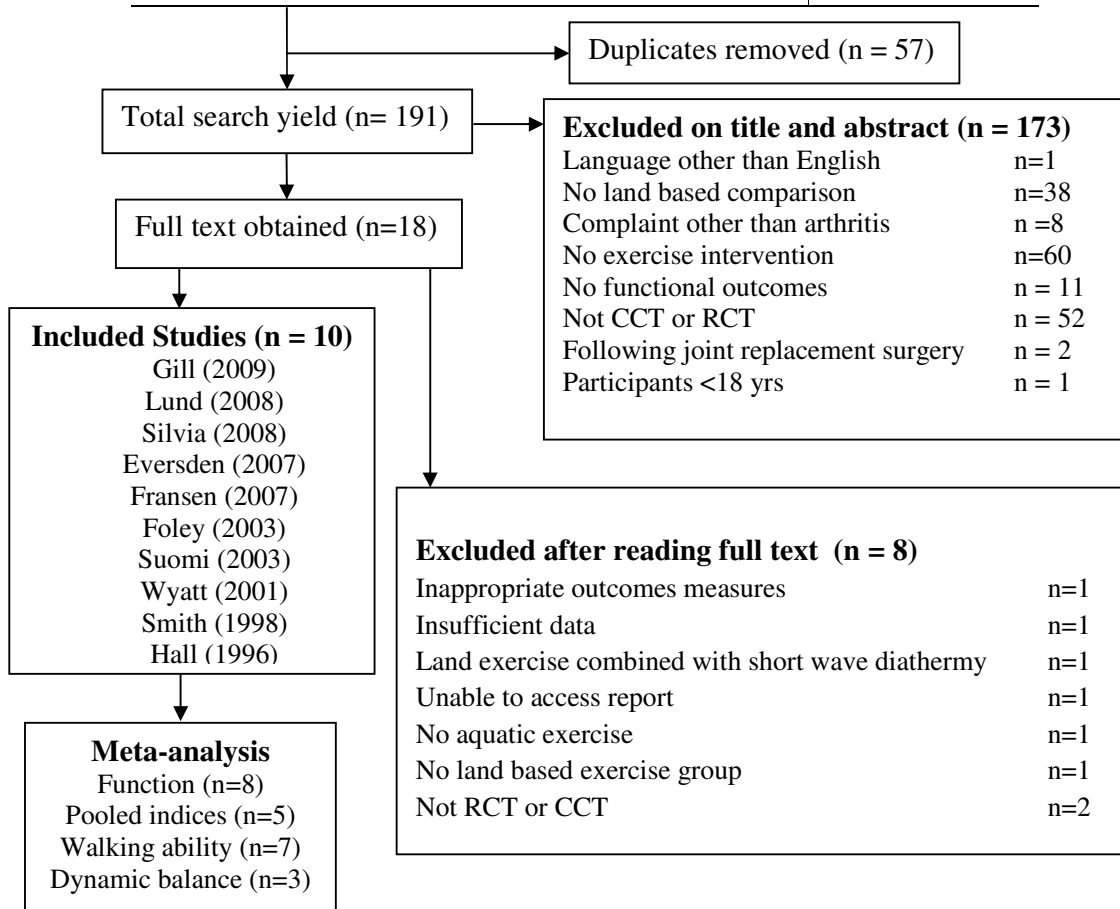

Supplement: MOESM4 [file 9507214]
